# Supplementary material for: On the Importance of Halogen and Chalcogen Bonds in the Solid State of Nucleic Acids: A Combined Crystallographic and Theoretical Perspective
Source: MDPI journal article supplement (doi:10.3390/ijms241713035), 2023-08-22
Supplement: s1 [file s1]

# On the Importance of Halogen and Chalcogen Bonds in the Solid State of Nucleic Acids: A Combined Crystallographic and Theoretical Perspective

María de las Nieves Piña and Antonio Bauzá \*

Department of Chemistry, Universitat de les Illes Balears, Crta. de Valldemossa km 7.5,  
07122 Palma (Balears), Spain

\* E-mail: antonio.bauza@uib.es; Fax: +34-971-173426

## Electronic Supporting Information

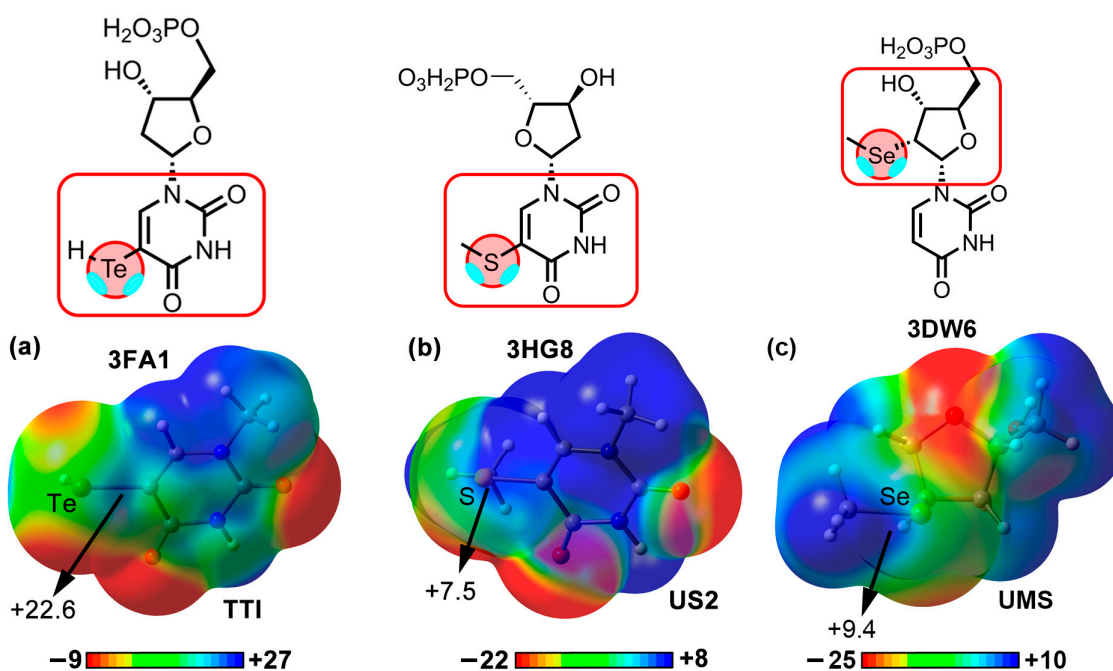

**Figure S1.** Molecular Electrostatic Potential (MEP) surfaces of the Se moieties present in (a) TTI, (b) US2 and (c) UMS ligands. Energy values at concrete regions of the surface are given in kcal/mol (0.001 a.u.). The MEP minima and maxima have been adjusted for a clear visualization of the Se  $\sigma$ -hole. The corresponding PDB codes are also included below the schematics of each molecule.

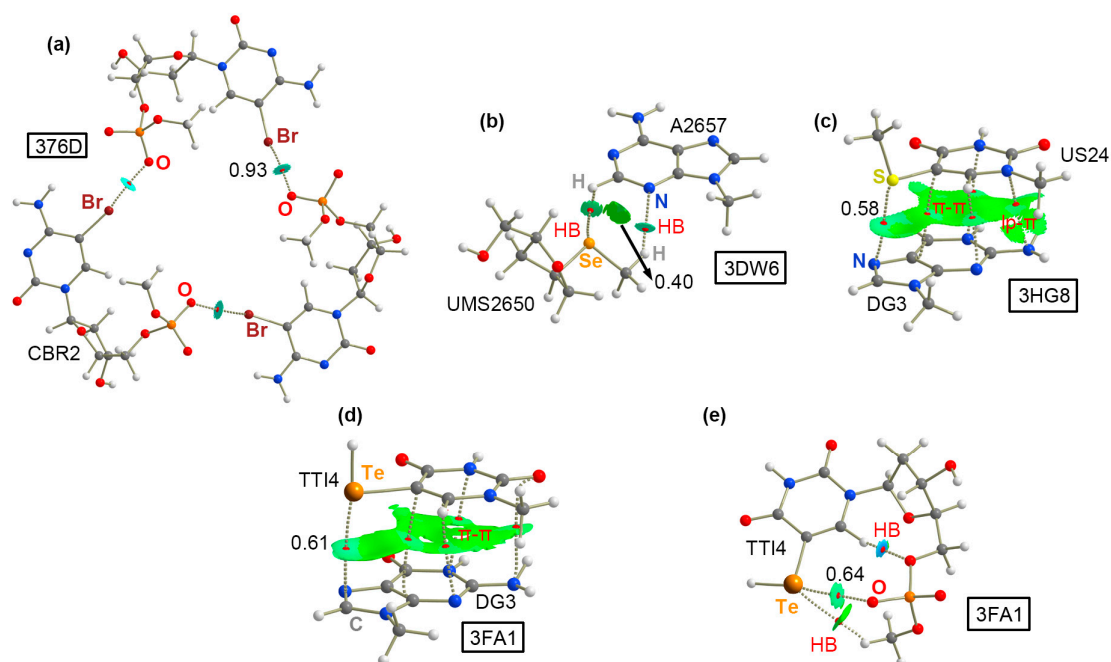

**Figure S2.** NCIplot analysis and AIM distribution of intermolecular bond critical points (BCP in red spheres) and bond paths in (a) 376D, (b) 3DW6, (c) 3HG8 and (d, e) 3FA1 structures. Additional interactions are denoted in red. The value of density at the BCPs characterizing the HlgB and ChB interaction is also indicated. NCIplot surfaces involving only intermolecular contacts. NCIplot color range  $-0.02 \text{ au} \leq (\text{sign}\lambda_2)\rho \leq +0.02 \text{ au}$ . Isosurface value  $|\text{RGD}| = 0.5$  and  $\rho$  cutoff  $0.04 \text{ au}$ .

### Cartesian coordinates of the PDB models used

#### 376D (O...Br)

|    |            |            |            |
|----|------------|------------|------------|
| C  | 4.0081253  | 2.7385083  | -2.9096030 |
| O  | 3.8881255  | 1.3865115  | -2.4826038 |
| P  | 3.2111271  | 0.7895130  | -1.1596068 |
| O  | 2.8081279  | -0.5904840 | -1.5806058 |
| O  | 2.0451296  | 1.5795110  | -0.6866079 |
| O  | 4.4101245  | 0.7395130  | -0.1086092 |
| C  | 5.5781218  | -0.0314853 | -0.5136082 |
| Br | -0.4928644 | 0.4845136  | 0.7013890  |
| N  | -4.4478555 | -0.4664845 | 1.3763874  |
| C  | -3.2588585 | 0.1675141  | 1.1493881  |
| C  | -4.4938555 | -1.8544813 | 1.5263873  |
| O  | -5.5768531 | -2.4184798 | 1.7173866  |
| N  | -3.3248582 | -2.5564797 | 1.4283874  |
| C  | -2.1488609 | -1.8914813 | 1.1893880  |
| N  | -1.0728633 | -2.6934794 | 1.1493881  |
| C  | -2.0788610 | -0.4734845 | 1.0443882  |
| C  | -5.7588529 | 0.1885141  | 1.4943873  |
| H  | 3.1688797  | 3.3541366  | -2.5081114 |
| H  | 5.2345719  | -0.9801482 | -0.9830729 |
| H  | 6.1939092  | 0.5322006  | -1.2509367 |
| H  | -3.3126651 | 1.2629263  | 1.0474767  |
| H  | -1.2528637 | -3.6963299 | 1.1658347  |
| H  | -6.2226930 | -0.0820390 | 2.4622273  |
| H  | 4.9689497  | 3.2049015  | -2.5758897 |

|   |            |            |            |
|---|------------|------------|------------|
| H | 3.9792390  | 2.7669743  | -4.0213822 |
| H | 6.1826885  | -0.2360793 | 0.3950121  |
| H | -0.1692667 | -2.3381871 | 0.8259676  |
| H | -5.6298425 | 1.2857032  | 1.4197109  |
| H | -6.4337419 | -0.1727871 | 0.6938938  |

### 3IBK (N···Br)

|    |            |            |            |
|----|------------|------------|------------|
| C  | -3.0992510 | 1.3090971  | 4.8279601  |
| N  | -2.2962516 | 1.3120971  | 3.5899608  |
| C  | -2.1332516 | 0.2750977  | 2.6969613  |
| N  | -1.2862520 | 0.5400975  | 1.7219619  |
| C  | -0.8712524 | 1.8440967  | 2.0029617  |
| C  | 0.0297472  | 2.7080963  | 1.3599621  |
| N  | 0.6807468  | 2.3850965  | 0.2639627  |
| N  | 0.2177470  | 3.9220955  | 1.8799618  |
| C  | -0.4442526 | 4.2510954  | 2.9899612  |
| N  | -1.3062520 | 3.5260958  | 3.6989608  |
| C  | -1.4782520 | 2.3210965  | 3.1449611  |
| C  | 1.1557466  | -4.3778997 | -4.3820347 |
| N  | 1.4857464  | -3.1319005 | -3.6480351 |
| C  | 2.4897458  | -2.3039009 | -4.1190349 |
| O  | 3.1967454  | -2.5779007 | -5.0740343 |
| N  | 2.6317458  | -1.1309016 | -3.4330352 |
| C  | 1.8777462  | -0.7029019 | -2.3440358 |
| O  | 2.1237460  | 0.3830975  | -1.8140361 |
| C  | 0.8437468  | -1.6089013 | -1.9220361 |
| C  | 0.6777468  | -2.7589007 | -2.5640357 |
| Br | -0.2242526 | -1.1589015 | -0.5060369 |
| H  | -2.5482794 | 1.8697100  | 5.6063691  |
| H  | -2.6730469 | -0.6737462 | 2.8263705  |
| H  | 0.6697647  | 1.4464654  | -0.1437485 |
| H  | -0.2437456 | 5.2697364  | 3.3742108  |
| H  | -0.0977474 | -3.4856838 | -2.2852579 |
| H  | 1.3550622  | 3.0535010  | -0.1079290 |
| H  | -4.0787798 | 1.8026268  | 4.6659181  |
| H  | -3.2588304 | 0.2656431  | 5.1563385  |
| H  | 0.8170298  | -4.1389925 | -5.4096296 |
| H  | 2.0549930  | -5.0185083 | -4.4582617 |
| H  | 0.3583153  | -4.9093729 | -3.8359674 |
| H  | 3.3746482  | -0.5037066 | -3.7547505 |

### 3IBK (-H replacing -NH<sub>2</sub> group)

|   |             |             |             |
|---|-------------|-------------|-------------|
| C | -3.09925100 | 1.30909710  | 4.82796010  |
| N | -2.29625160 | 1.31209710  | 3.58996080  |
| C | -2.13325160 | 0.27509770  | 2.69696130  |
| N | -1.28625200 | 0.54009750  | 1.72196190  |
| C | -0.87125240 | 1.84409670  | 2.00296170  |
| C | 0.02974720  | 2.70809630  | 1.35996210  |
| N | 0.21774700  | 3.92209550  | 1.87996180  |
| C | -0.44425260 | 4.25109540  | 2.98996120  |
| N | -1.30625200 | 3.52609580  | 3.69896080  |
| C | -1.47825200 | 2.32109650  | 3.14496110  |
| C | 1.15574660  | -4.37789970 | -4.38203470 |
| N | 1.48574640  | -3.13190050 | -3.64803510 |
| C | 2.48974580  | -2.30390090 | -4.11903490 |
| O | 3.19674540  | -2.57790070 | -5.07403430 |
| N | 2.63174580  | -1.13090160 | -3.43303520 |
| C | 1.87774620  | -0.70290190 | -2.34403580 |
| O | 2.12374600  | 0.38309750  | -1.81403610 |
| C | 0.84374680  | -1.60890130 | -1.92203610 |
| C | 0.67774680  | -2.75890070 | -2.56403570 |

|    |             |             |             |
|----|-------------|-------------|-------------|
| Br | -0.22425260 | -1.15890150 | -0.50603690 |
| H  | -2.54827940 | 1.86971000  | 5.60636910  |
| H  | -2.67304690 | -0.67374620 | 2.82637050  |
| H  | -0.24374560 | 5.26973640  | 3.37421080  |
| H  | -0.09774740 | -3.48568380 | -2.28525790 |
| H  | -4.07877980 | 1.80262680  | 4.66591810  |
| H  | -3.25883040 | 0.26564310  | 5.15633850  |
| H  | 0.81702980  | -4.13899250 | -5.40962960 |
| H  | 2.05499300  | -5.01850830 | -4.45826170 |
| H  | 0.35831530  | -4.90937290 | -3.83596740 |
| H  | 3.37464820  | -0.50370660 | -3.75475050 |
| H  | 0.49587657  | 2.47682167  | 0.57520353  |

# 6JKN ( $\pi \cdots \text{Br}$ )

|    |            |            |            |
|----|------------|------------|------------|
| N  | 2.0103577  | 0.7893834  | 2.3340262  |
| C  | 0.9733607  | 0.3173846  | 3.0100242  |
| N  | 1.0943604  | 0.2023852  | 4.3300206  |
| C  | 2.3363567  | 0.6373838  | 4.5450198  |
| C  | 2.9423550  | 1.0133828  | 3.2570236  |
| N  | 4.1973516  | 1.4883815  | 3.2210237  |
| C  | 4.8953497  | 1.6293811  | 4.3590204  |
| N  | 6.1503460  | 2.1093796  | 4.2860207  |
| N  | 4.3863509  | 1.2873821  | 5.5620171  |
| C  | 3.1583545  | 0.7943834  | 5.7400167  |
| O  | 2.6843557  | 0.4873844  | 6.8750132  |
| Br | -0.7126345 | -0.2426136 | 2.1470267  |
| C  | -0.4016355 | 1.2603823  | -4.2779553 |
| C  | 0.3153625  | 0.0913854  | -3.6049573 |
| O  | -0.1576363 | -0.0376144 | -2.2279612 |
| C  | 0.0663630  | -1.2726106 | -4.2579553 |
| O  | 1.2053598  | -2.1056084 | -4.1119558 |
| C  | -1.0916335 | -1.8226093 | -3.4509578 |
| C  | -0.7486345 | -1.3156106 | -2.0519616 |
| N  | -1.9466313 | -1.1996109 | -1.1849640 |
| C  | -2.1546305 | -2.1626084 | -0.2219668 |
| O  | -1.3816328 | -3.0936056 | -0.0309673 |
| N  | -3.2946273 | -1.9986086 | 0.5220312  |
| C  | -4.2436246 | -1.0026115 | 0.3890317  |
| O  | -5.2506220 | -0.9516116 | 1.0980297  |
| C  | -3.9846255 | -0.0386144 | -0.6579654 |
| C  | -4.9486226 | 1.0813826  | -0.8949648 |
| C  | -2.8636285 | -0.1826136 | -1.3979633 |
| H  | 6.8289447  | 1.9111044  | 5.0202751  |
| H  | -0.3207603 | 2.1701199  | -3.6521701 |
| H  | 0.0389412  | 1.4788959  | -5.2724164 |
| H  | 1.4101011  | 0.2895768  | -3.5613032 |
| H  | -0.2090566 | -1.1494168 | -5.3345497 |
| H  | -1.1666258 | -2.9244658 | -3.5050369 |
| H  | -2.0455652 | -1.3777400 | -3.7977965 |
| H  | -0.0704051 | -2.0127412 | -1.5188658 |
| H  | -5.9655856 | 0.6895521  | -1.1048729 |
| H  | -5.0492900 | 1.7123552  | 0.0129265  |
| H  | -4.6294568 | 1.7223089  | -1.7390275 |
| H  | -2.5721905 | 0.5275104  | -2.1854177 |
| H  | -1.4791147 | 1.0361552  | -4.4192004 |
| H  | 1.9419231  | -1.6869102 | -4.5923412 |
| H  | 4.9131527  | 1.4191990  | 6.4335862  |
| H  | 6.5162230  | 2.2119547  | 3.3394480  |
| H  | -3.4503189 | -2.7004257 | 1.2519342  |
| H  | 2.0667007  | 0.9247418  | 1.3227400  |

**6JKN (n···Br) Trimer**

|    |              |             |             |
|----|--------------|-------------|-------------|
| C  | -22.89100000 | 30.64500000 | 59.81900000 |
| N  | -22.52600000 | 29.25300000 | 60.19300000 |
| C  | -21.89200000 | 29.00600000 | 61.39100000 |
| O  | -21.71000000 | 29.86400000 | 62.24000000 |
| N  | -21.52000000 | 27.69400000 | 61.58100000 |
| C  | -21.68200000 | 26.64300000 | 60.68200000 |
| O  | -21.30600000 | 25.50400000 | 60.91700000 |
| C  | -22.33800000 | 26.98000000 | 59.46200000 |
| C  | -22.57600000 | 25.92300000 | 58.43200000 |
| C  | -22.70100000 | 28.25200000 | 59.26400000 |
| C  | -14.02400000 | 30.10500000 | 57.82900000 |
| N  | -14.28900000 | 30.14900000 | 56.38100000 |
| C  | -15.21600000 | 29.48700000 | 55.70500000 |
| N  | -15.25500000 | 29.64900000 | 54.38500000 |
| C  | -14.25700000 | 30.50700000 | 54.17000000 |
| C  | -13.62900000 | 30.84400000 | 55.45800000 |
| N  | -12.59000000 | 31.69300000 | 55.49400000 |
| C  | -12.11900000 | 32.22700000 | 54.35600000 |
| N  | -11.07500000 | 33.07400000 | 54.42900000 |
| N  | -12.66900000 | 31.95700000 | 53.15300000 |
| C  | -13.71000000 | 31.14000000 | 52.97500000 |
| O  | -14.21300000 | 30.88300000 | 51.84000000 |
| Br | -16.54400000 | 28.30600000 | 56.56800000 |
| C  | -17.49100000 | 28.81200000 | 60.76700000 |
| N  | -17.99000000 | 27.71700000 | 59.90000000 |
| C  | -18.92800000 | 28.01800000 | 58.93700000 |
| O  | -19.34800000 | 29.15300000 | 58.74600000 |
| N  | -19.35600000 | 26.94900000 | 58.19300000 |
| C  | -18.96800000 | 25.62900000 | 58.32600000 |
| O  | -19.42700000 | 24.73100000 | 57.61700000 |
| C  | -18.00400000 | 25.37100000 | 59.37300000 |
| C  | -17.51600000 | 23.97600000 | 59.61000000 |
| C  | -17.56800000 | 26.41400000 | 60.11300000 |
| H  | -22.76264060 | 31.27489450 | 60.71591460 |
| H  | -21.65020130 | 25.37336550 | 58.16548340 |
| H  | -23.27614130 | 25.15250620 | 58.82127540 |
| H  | -23.01827720 | 26.35023980 | 57.51078800 |
| H  | -23.19236200 | 28.57655860 | 58.33370540 |
| H  | -14.91564800 | 30.45138930 | 58.38524170 |
| H  | -10.80246020 | 33.34222340 | 55.37433660 |
| H  | -17.60791410 | 29.76161290 | 60.21597170 |
| H  | -16.76224400 | 23.93847080 | 60.41962240 |
| H  | -18.36439760 | 23.31297000 | 59.87903300 |
| H  | -17.07418410 | 23.55189540 | 58.68473760 |
| H  | -16.84168200 | 26.28932870 | 60.93041390 |
| H  | -13.78345810 | 29.06914660 | 58.13381650 |
| H  | -13.16562520 | 30.77184470 | 58.02807250 |
| H  | -16.42617580 | 28.63172000 | 61.00469820 |
| H  | -18.08359760 | 28.87165250 | 61.70278360 |
| H  | -22.22046200 | 31.00194120 | 59.01234040 |
| H  | -23.94575250 | 30.67153930 | 59.48385080 |
| H  | -10.89697090 | 33.75263370 | 53.68979410 |
| H  | -12.29108170 | 32.34834690 | 52.28208660 |
| H  | -20.05827510 | 27.16474200 | 57.48026970 |
| H  | -21.07703390 | 27.48281190 | 62.47875570 |

**1UE2 (O···I)**

|   |            |            |           |
|---|------------|------------|-----------|
| C | -3.1750821 | -4.7457083 | 1.6070991 |
| N | -1.8920867 | -4.0537107 | 1.4430997 |

|   |            |            |            |
|---|------------|------------|------------|
| C | -0.7210910 | -4.8217080 | 1.4850995  |
| O | -0.8270906 | -6.0587034 | 1.6420989  |
| N | 0.4809044  | -4.2197101 | 1.3511000  |
| C | 0.5539043  | -2.8997150 | 1.1531007  |
| N | 1.7578999  | -2.3577170 | 1.0501012  |
| C | -0.6300916 | -2.0827179 | 1.0711011  |
| C | -1.8210871 | -2.6967158 | 1.2391004  |
| I | -0.5420918 | -0.0467254 | 0.5781028  |
| C | -0.2910927 | 4.6832574  | -2.9708842 |
| O | 0.9299030  | 4.0612595  | -2.5908855 |
| P | 1.0119027  | 3.1752628  | -1.2508905 |
| O | -0.3480923 | 2.7912642  | -0.7598922 |
| O | 2.0108990  | 2.1232667  | -1.5198894 |
| O | 1.6369004  | 4.1782591  | -0.1918943 |
| C | 2.8878957  | 4.8032569  | -0.4628933 |
| H | -3.1510426 | -5.3600498 | 2.5284381  |
| H | 2.5617666  | -2.9845370 | 1.0430729  |
| H | -2.7765634 | -2.1532155 | 1.1930098  |
| H | -1.1572851 | 4.1400059  | -2.5330729 |
| H | 3.6327138  | 4.0443017  | -0.7975792 |
| H | 2.7972871  | 5.5737681  | -1.2654088 |
| H | -0.3679850 | 4.6802377  | -4.0815533 |
| H | -0.3399091 | 5.7468781  | -2.6282998 |
| H | 3.2460473  | 5.2938198  | 0.4678642  |
| H | 1.8710845  | -1.3765208 | 0.7799853  |
| H | -3.3494943 | -5.4383053 | 0.7587168  |
| H | -3.9899607 | -3.9987827 | 1.6610344  |

# 2H1M (Se···Se)

|    |             |             |             |
|----|-------------|-------------|-------------|
| C  | 3.46994320  | -3.12516580 | -1.13296240 |
| O  | 4.44394320  | -2.10716580 | -0.88196240 |
| C  | 2.56194320  | -3.18216580 | 0.07903760  |
| Se | 0.98094320  | -2.06416580 | -0.24696240 |
| C  | -0.09005680 | -3.35916580 | -1.27796240 |
| C  | 3.40194320  | -2.55916580 | 1.16303760  |
| C  | 4.27094320  | -1.57416580 | 0.43103760  |
| C  | 5.58294320  | -1.47616580 | 1.17103760  |
| O  | 6.40094320  | -0.59216580 | 0.43803760  |
| C  | 0.97194320  | 4.56783420  | -1.13296240 |
| O  | -0.39705680 | 4.90183420  | -0.88196240 |
| C  | 1.47494320  | 3.80983420  | 0.07903760  |
| Se | 1.29694320  | 1.88083420  | -0.24696240 |
| C  | 2.95394320  | 1.60083420  | -1.27796240 |
| C  | 0.51494320  | 4.22583420  | 1.16303760  |
| C  | -0.77205680 | 4.48583420  | 0.43103760  |
| C  | -1.51305680 | 5.57283420  | 1.17103760  |
| O  | -2.68805680 | 5.83883420  | 0.43803760  |
| H  | 2.92627660  | -2.90415630 | -2.07657710 |
| H  | 2.20802250  | -4.20399320 | 0.31917360  |
| H  | 0.43208860  | -3.65980780 | -2.20795070 |
| H  | -0.32599870 | -4.24926750 | -0.66324260 |
| H  | -1.03345730 | -2.84085220 | -1.53918460 |
| H  | 4.03640470  | -3.34867600 | 1.62500110  |
| H  | 3.80759010  | -0.56078140 | 0.37416470  |
| H  | 5.37479100  | -1.12649390 | 2.21552110  |
| H  | 6.02506460  | -2.50254090 | 1.23684210  |
| H  | 1.05277260  | 3.98693280  | -2.07688480 |
| H  | 2.53691910  | 4.01392170  | 0.31936260  |
| H  | 2.95797370  | 2.21273910  | -2.20155080 |
| H  | 3.84323640  | 1.83011840  | -0.65954670 |
| H  | 2.96965960  | 0.52704450  | -1.54986600 |

|   |             |             |             |
|---|-------------|-------------|-------------|
| H | 0.88160780  | 5.17035130  | 1.62393500  |
| H | -1.41741730 | 3.57762290  | 0.37445770  |
| H | -1.71131570 | 5.21788530  | 2.21564930  |
| H | -0.84585990 | 6.46934650  | 1.23640640  |
| H | -3.16155470 | 6.57338990  | 0.86711820  |
| H | 7.27141640  | -0.54375660 | 0.87157400  |
| H | 2.80394090  | -2.10711230 | 1.97975540  |
| H | 0.42215400  | 3.48187610  | 1.97941140  |
| H | 4.00154750  | -4.09952560 | -1.27874050 |
| H | 1.54963530  | 5.51579260  | -1.27761640 |

**7Y8P (O···Se)**

|    |            |            |            |
|----|------------|------------|------------|
| C  | 1.7500000  | 2.2470000  | 26.8570000 |
| C  | 2.7190000  | 2.5480000  | 28.0100000 |
| C  | 3.4340000  | 1.2520000  | 28.5080000 |
| C  | 4.0560000  | 0.5980000  | 27.2760000 |
| O  | 3.6740000  | 3.4870000  | 27.5510000 |
| O  | 4.4090000  | 1.6830000  | 29.4540000 |
| Se | 2.7650000  | 0.9030000  | 25.8910000 |
| C  | 3.3490000  | 5.5960000  | 31.1720000 |
| C  | 2.4470000  | 5.5020000  | 32.3830000 |
| O  | 3.0900000  | 5.8180000  | 33.6070000 |
| C  | 1.2580000  | 6.4320000  | 32.0150000 |
| O  | 1.7940000  | 7.7930000  | 31.9630000 |
| C  | 0.5760000  | 6.1580000  | 30.7160000 |
| Se | 2.1470000  | 5.6870000  | 29.6580000 |
| H  | 1.5960248  | 3.1484475  | 26.2357390 |
| H  | 2.1455912  | 2.9804211  | 28.8739048 |
| H  | 2.6825455  | 0.5656738  | 28.9660170 |
| H  | 5.0121597  | 1.1059698  | 27.0364026 |
| H  | 4.4138592  | 3.4173704  | 28.1924783 |
| H  | 3.9573830  | 6.5203875  | 31.2254615 |
| H  | 2.0390836  | 4.4581582  | 32.4251053 |
| H  | 0.5072616  | 6.3760488  | 32.8524848 |
| H  | 2.3863412  | 7.8512616  | 32.7413728 |
| H  | 0.0930767  | 7.0756092  | 30.3337464 |
| H  | 2.4726761  | 5.5866035  | 34.3255638 |
| H  | 4.2389428  | -0.4853903 | 27.4075076 |
| H  | -0.1446627 | 5.3203862  | 30.7711112 |
| H  | 0.7820454  | 1.8469513  | 27.2151575 |
| H  | 3.9320412  | 1.9076678  | 30.2741223 |
| H  | 4.0217894  | 4.7238895  | 31.0541111 |

**3LTU (π···Se)**

|   |            |            |            |
|---|------------|------------|------------|
| C | 41.1170000 | 29.0730000 | 20.5660000 |
| N | 40.5160000 | 29.8420000 | 21.6510000 |
| C | 40.9340000 | 31.0490000 | 22.1620000 |
| N | 40.1780000 | 31.4950000 | 23.1260000 |
| C | 39.1960000 | 30.5200000 | 23.2640000 |
| C | 38.0920000 | 30.4440000 | 24.1500000 |
| O | 37.7590000 | 31.2540000 | 25.0220000 |
| N | 37.3370000 | 29.2850000 | 23.9620000 |
| C | 37.6110000 | 28.3150000 | 23.0240000 |
| N | 36.7810000 | 27.2650000 | 22.9760000 |
| N | 38.6420000 | 28.3700000 | 22.1880000 |
| C | 39.3890000 | 29.4940000 | 22.3640000 |
| N | 35.5570000 | 29.2340000 | 20.3800000 |
| C | 36.5520000 | 30.1750000 | 20.1790000 |
| C | 34.5900000 | 29.4110000 | 21.3500000 |
| O | 33.6890000 | 28.6230000 | 21.5600000 |
| N | 34.7120000 | 30.5620000 | 22.0860000 |

|    |            |            |            |
|----|------------|------------|------------|
| C  | 35.6750000 | 31.5390000 | 21.9320000 |
| O  | 35.6830000 | 32.5310000 | 22.6460000 |
| C  | 36.6570000 | 31.3000000 | 20.8990000 |
| Se | 38.0580000 | 32.5630000 | 20.5790000 |
| C  | 37.3010000 | 33.8890000 | 19.4150000 |
| C  | 35.5100000 | 27.9980000 | 19.5340000 |
| H  | 40.7215199 | 28.0412875 | 20.6114003 |
| H  | 41.8232379 | 31.5535711 | 21.7579276 |
| H  | 35.8033212 | 27.3697237 | 23.2536546 |
| H  | 37.2612302 | 29.9319124 | 19.3736026 |
| H  | 36.9767521 | 33.4784560 | 18.4383834 |
| H  | 36.4600866 | 34.4215949 | 19.9005934 |
| H  | 38.1268665 | 34.6085486 | 19.2482122 |
| H  | 34.6694540 | 27.3830770 | 19.8989729 |
| H  | 35.3433695 | 28.2716997 | 18.4739408 |
| H  | 36.4687615 | 27.4523984 | 19.6353694 |
| H  | 42.2182694 | 29.0484711 | 20.6770034 |
| H  | 40.8607586 | 29.5124519 | 19.5794726 |
| H  | 36.9420074 | 26.6218375 | 22.2005675 |
| H  | 36.5507293 | 29.1894458 | 24.6107216 |
| H  | 33.9961581 | 30.7244645 | 22.7999706 |

**3LTU (-H replacing a -SeCH<sub>3</sub> group)**

|   |             |             |             |
|---|-------------|-------------|-------------|
| C | 41.11700000 | 29.07300000 | 20.56600000 |
| N | 40.51600000 | 29.84200000 | 21.65100000 |
| C | 40.93400000 | 31.04900000 | 22.16200000 |
| N | 40.17800000 | 31.49500000 | 23.12600000 |
| C | 39.19600000 | 30.52000000 | 23.26400000 |
| C | 38.09200000 | 30.44400000 | 24.15000000 |
| O | 37.75900000 | 31.25400000 | 25.02200000 |
| N | 37.33700000 | 29.28500000 | 23.96200000 |
| C | 37.61100000 | 28.31500000 | 23.02400000 |
| N | 36.78100000 | 27.26500000 | 22.97600000 |
| N | 38.64200000 | 28.37000000 | 22.18800000 |
| C | 39.38900000 | 29.49400000 | 22.36400000 |
| N | 35.55700000 | 29.23400000 | 20.38000000 |
| C | 36.55200000 | 30.17500000 | 20.17900000 |
| C | 34.59000000 | 29.41100000 | 21.35000000 |
| O | 33.68900000 | 28.62300000 | 21.56000000 |
| N | 34.71200000 | 30.56200000 | 22.08600000 |
| C | 35.67500000 | 31.53900000 | 21.93200000 |
| O | 35.68300000 | 32.53100000 | 22.64600000 |
| C | 36.65700000 | 31.30000000 | 20.89900000 |
| C | 35.51000000 | 27.99800000 | 19.53400000 |
| H | 40.72151990 | 28.04128750 | 20.61140030 |
| H | 41.82323790 | 31.55357110 | 21.75792760 |
| H | 35.80332120 | 27.36972370 | 23.25365460 |
| H | 37.26123020 | 29.93191240 | 19.37360260 |
| H | 34.66945400 | 27.38307700 | 19.89897290 |
| H | 35.34336950 | 28.27169970 | 18.47394080 |
| H | 36.46876150 | 27.45239840 | 19.63536940 |
| H | 42.21826940 | 29.04847110 | 20.67700340 |
| H | 40.86075860 | 29.51245190 | 19.57947260 |
| H | 36.94200740 | 26.62183750 | 22.20056750 |
| H | 36.55072930 | 29.18944580 | 24.61072160 |
| H | 33.99615810 | 30.72446450 | 22.79997060 |
| H | 37.44053684 | 32.00635762 | 20.72003370 |

**4KW0 (O...Se) (closed conformation)**

|   |            |             |            |
|---|------------|-------------|------------|
| C | 8.85700000 | 25.03400000 | 0.86000000 |
| O | 9.64300000 | 26.18600000 | 0.61200000 |



|    |             |             |             |
|----|-------------|-------------|-------------|
| C  | 11.45000000 | 23.56100000 | -3.54000000 |
| O  | 11.71400000 | 24.31100000 | -2.38200000 |
| C  | 10.61600000 | 24.49300000 | -4.41900000 |
| Se | 8.74400000  | 24.80000000 | -3.85500000 |
| C  | 7.63900000  | 23.68200000 | -5.06300000 |
| C  | 11.44400000 | 25.76000000 | -4.23000000 |
| O  | 12.50000000 | 25.71000000 | -5.14800000 |
| C  | 12.03700000 | 25.64500000 | -2.82600000 |
| C  | 11.52300000 | 26.63700000 | -1.79900000 |
| O  | 10.11800000 | 26.63500000 | -1.81000000 |
| P  | 9.32300000  | 27.22600000 | -0.56100000 |
| O  | 7.87900000  | 27.15300000 | -0.88100000 |
| O  | 9.95200000  | 28.50200000 | -0.14800000 |
| H  | 7.77660540  | 25.26952620 | 0.76798950  |
| H  | 12.39018100 | 23.29672520 | -4.08904570 |
| H  | 10.59643730 | 24.19886030 | -5.48698470 |
| H  | 6.60065340  | 23.92766890 | -4.76792020 |
| H  | 7.81253770  | 22.59836870 | -4.91355270 |
| H  | 7.78626980  | 23.94873830 | -6.12839360 |
| H  | 10.83309170 | 26.68732920 | -4.33925520 |
| H  | 13.14240250 | 25.77183010 | -2.92095420 |
| H  | 11.91292140 | 26.33079100 | -0.80204990 |
| H  | 11.92239100 | 27.65048240 | -2.03491900 |
| H  | 12.13628150 | 25.88087280 | -6.03537720 |
| H  | 9.10649650  | 24.22947150 | 0.13469890  |
| H  | 9.08876940  | 24.68746210 | 1.88602400  |
| H  | 10.93327640 | 22.62642740 | -3.24339780 |

#### 4KW0 (O···Se) (open conformation)

|    |             |             |             |
|----|-------------|-------------|-------------|
| C  | 14.43056971 | 29.05444582 | -0.23393128 |
| O  | 13.02607098 | 28.88280894 | -0.29971956 |
| C  | 11.45000000 | 23.56100000 | -3.54000000 |
| O  | 11.71400000 | 24.31100000 | -2.38200000 |
| C  | 10.61600000 | 24.49300000 | -4.41900000 |
| Se | 8.74400000  | 24.80000000 | -3.85500000 |
| C  | 7.63900000  | 23.68200000 | -5.06300000 |
| C  | 11.44400000 | 25.76000000 | -4.23000000 |
| O  | 12.50000000 | 25.71000000 | -5.14800000 |
| C  | 12.03700000 | 25.64500000 | -2.82600000 |
| C  | 11.52300000 | 26.63700000 | -1.79900000 |
| O  | 12.26877990 | 26.51203919 | -0.61479261 |
| P  | 12.25462503 | 27.69840327 | 0.44993595  |
| O  | 13.06515879 | 27.26158786 | 1.60971710  |
| O  | 10.86263327 | 28.17408392 | 0.62450073  |
| H  | 14.79906487 | 28.87750547 | 0.79761825  |
| H  | 12.39018100 | 23.29672520 | -4.08904570 |
| H  | 10.59643730 | 24.19886030 | -5.48698470 |
| H  | 6.60065340  | 23.92766890 | -4.76792020 |
| H  | 7.81253770  | 22.59836870 | -4.91355270 |
| H  | 7.78626980  | 23.94873830 | -6.12839360 |
| H  | 10.83309170 | 26.68732920 | -4.33925520 |
| H  | 13.14240250 | 25.77183010 | -2.92095420 |
| H  | 11.62717693 | 27.65911484 | -2.22811602 |
| H  | 10.44127465 | 26.44462567 | -1.61143694 |
| H  | 12.13628150 | 25.88087280 | -6.03537720 |
| H  | 14.94171328 | 28.34359283 | -0.91876452 |
| H  | 14.65420930 | 30.09229547 | -0.54918398 |
| H  | 10.93327640 | 22.62642740 | -3.24339780 |

#### 3DW6 (N···Se)

|   |            |            |           |
|---|------------|------------|-----------|
| O | -1.7036064 | -3.7728208 | 5.1070992 |
|---|------------|------------|-----------|

|    |            |            |            |
|----|------------|------------|------------|
| C  | -2.0536060 | -3.6638209 | 3.7551008  |
| C  | -1.5166067 | -2.3448224 | 3.1821014  |
| O  | -2.0806060 | -1.2358236 | 3.9421005  |
| C  | -0.0116083 | -2.1868225 | 3.3761012  |
| C  | 0.1473914  | -0.7058242 | 3.1761014  |
| Se | 0.0183917  | -0.1928248 | 1.3971034  |
| C  | -1.0416071 | -0.2178248 | 4.0141004  |
| C  | 0.3553913  | 1.6011732  | 1.3871034  |
| C  | -1.0336072 | 3.3361712  | -2.6778920 |
| N  | -0.0966083 | 2.6791720  | -3.5818910 |
| C  | 0.2233914  | 3.0151716  | -4.8688896 |
| N  | 1.0923905  | 2.1991726  | -5.4208889 |
| C  | 1.3533901  | 1.2701736  | -4.4258901 |
| C  | 2.1833892  | 0.1351748  | -4.3688901 |
| N  | 2.9463884  | -0.2728246 | -5.3858889 |
| N  | 2.2033892  | -0.5678244 | -3.2168914 |
| C  | 1.4373901  | -0.1698248 | -2.1968925 |
| N  | 0.6173909  | 0.8741740  | -2.1328926 |
| C  | 0.6253909  | 1.5521732  | -3.2888913 |
| H  | -3.1630422 | -3.6745049 | 3.6070433  |
| H  | -1.6347501 | -4.4894169 | 3.1228953  |
| H  | -1.8081215 | -2.2834477 | 2.1063979  |
| H  | 0.2440499  | -2.4734927 | 4.4149008  |
| H  | 1.1009259  | -0.3252534 | 3.6049086  |
| H  | -1.4555046 | 0.7547457  | 3.6678430  |
| H  | 1.3522073  | 1.8734075  | 1.7969746  |
| H  | -0.4126640 | 2.2147079  | 1.9064076  |
| H  | 0.3501677  | 1.8703853  | 0.3103389  |
| H  | -1.6323738 | 2.5685806  | -2.1510091 |
| H  | -0.2289312 | 3.8902231  | -5.3575259 |
| H  | 3.5209564  | -1.1058917 | -5.2686956 |
| H  | 1.5017739  | -0.7846655 | -1.2792919 |
| H  | -0.7425189 | -0.0940093 | 5.0832426  |
| H  | -2.0018310 | -4.6410052 | 5.4277614  |
| H  | -1.7049192 | 3.9950095  | -3.2590712 |
| H  | -0.4965970 | 3.9393098  | -1.9175404 |
| H  | 2.9514480  | 0.2441209  | -6.2625575 |
| H  | 0.5849991  | -2.8096842 | 2.6772552  |

### 3HG8 ( $\pi \cdots S$ )

|   |             |             |             |
|---|-------------|-------------|-------------|
| C | 0.90053550  | -3.62303830 | 0.88043130  |
| N | 0.11653780  | -2.98804010 | -0.17556540 |
| C | -1.10745840 | -3.37703890 | -0.67156390 |
| N | -1.55145710 | -2.61104120 | -1.62956100 |
| C | -0.55246000 | -1.65304430 | -1.78656050 |
| C | -0.45646050 | -0.54704770 | -2.67055770 |
| O | -1.26845780 | -0.18604880 | -3.52955510 |
| N | 0.72753610  | 0.17395010  | -2.49055830 |
| C | 1.70153290  | -0.12904890 | -1.56756110 |
| N | 2.78552950  | 0.66594850  | -1.51556140 |
| N | 1.62753320  | -1.16004580 | -0.73856370 |
| C | 0.47953670  | -1.87204360 | -0.89956320 |
| N | 0.84653560  | 1.92194470  | 1.13343060  |
| C | -0.10365171 | 0.87388838  | 1.41422753  |
| C | 0.63353620  | 2.82594190  | 0.16143350  |
| O | 1.41653390  | 3.78293900  | -0.03356590 |
| N | -0.51746010 | 2.73294230  | -0.57756430 |
| C | -1.48645730 | 1.77494510  | -0.38356480 |
| O | -2.49545400 | 1.78594500  | -1.11856250 |
| C | -1.30145780 | 0.82194800  | 0.62643200  |
| S | -2.39545430 | -0.44604800 | 0.97943090  |

|   |             |             |             |
|---|-------------|-------------|-------------|
| C | -3.59545070 | 0.38494940  | 1.96042800  |
| C | 2.09253170  | 1.91494470  | 1.91442800  |
| H | 1.97307220  | -3.42136290 | 0.69883840  |
| H | -1.62842810 | -4.25335990 | -0.25962580 |
| H | 3.43183410  | 0.46323560  | -0.75300450 |
| H | 0.10598989  | 0.12576038  | 2.23255213  |
| H | -4.37339420 | -0.36515770 | 2.20771490  |
| H | -3.18237750 | 0.78467420  | 2.91014420  |
| H | -4.08176850 | 1.20438740  | 1.39235580  |
| H | 2.71007230  | 2.73471500  | 1.50833490  |
| H | 1.87027830  | 2.09721040  | 2.98368750  |
| H | 2.58832820  | 0.93149820  | 1.79515880  |
| H | 0.62537670  | -3.22014520 | 1.87762320  |
| H | 0.72465010  | -4.71539760 | 0.87101270  |
| H | 2.71611030  | 1.65061340  | -1.77936190 |
| H | 0.83610030  | 0.96199040  | -3.13514800 |
| H | -0.68302240 | 3.45085250  | -1.28548580 |

### 3HG8 (-H replacing a -SCH<sub>3</sub> group)

|   |             |             |             |
|---|-------------|-------------|-------------|
| C | 0.90053550  | -3.62303830 | 0.88043130  |
| N | 0.11653780  | -2.98804010 | -0.17556540 |
| C | -1.10745840 | -3.37703890 | -0.67156390 |
| N | -1.55145710 | -2.61104120 | -1.62956100 |
| C | -0.55246000 | -1.65304430 | -1.78656050 |
| C | -0.45646050 | -0.54704770 | -2.67055770 |
| O | -1.26845780 | -0.18604880 | -3.52955510 |
| N | 0.72753610  | 0.17395010  | -2.49055830 |
| C | 1.70153290  | -0.12904890 | -1.56756110 |
| N | 2.78552950  | 0.66594850  | -1.51556140 |
| N | 1.62753320  | -1.16004580 | -0.73856370 |
| C | 0.47953670  | -1.87204360 | -0.89956320 |
| N | 0.84653560  | 1.92194470  | 1.13343060  |
| C | -0.10365171 | 0.87388838  | 1.41422753  |
| C | 0.63353620  | 2.82594190  | 0.16143350  |
| O | 1.41653390  | 3.78293900  | -0.03356590 |
| N | -0.51746010 | 2.73294230  | -0.57756430 |
| C | -1.48645730 | 1.77494510  | -0.38356480 |
| O | -2.49545400 | 1.78594500  | -1.11856250 |
| C | -1.30145780 | 0.82194800  | 0.62643200  |
| C | 2.09253170  | 1.91494470  | 1.91442800  |
| H | 1.97307220  | -3.42136290 | 0.69883840  |
| H | -1.62842810 | -4.25335990 | -0.25962580 |
| H | 3.43183410  | 0.46323560  | -0.75300450 |
| H | 0.10598989  | 0.12576038  | 2.23255213  |
| H | 2.71007230  | 2.73471500  | 1.50833490  |
| H | 1.87027830  | 2.09721040  | 2.98368750  |
| H | 2.58832820  | 0.93149820  | 1.79515880  |
| H | 0.62537670  | -3.22014520 | 1.87762320  |
| H | 0.72465010  | -4.71539760 | 0.87101270  |
| H | 2.71611030  | 1.65061340  | -1.77936190 |
| H | 0.83610030  | 0.96199040  | -3.13514800 |
| H | -0.68302240 | 3.45085250  | -1.28548580 |
| H | -1.98540324 | 0.02922144  | 0.84712008  |

### 3FA1 (O...Te)

|   |             |             |             |
|---|-------------|-------------|-------------|
| C | 35.44200000 | 23.68400000 | 3.30300000  |
| N | 34.65800000 | 24.18600000 | 2.18000000  |
| C | 33.46200000 | 23.70800000 | 1.70000000  |
| N | 33.00100000 | 24.40300000 | 0.69500000  |
| C | 33.95400000 | 25.39500000 | 0.49900000  |
| C | 34.00200000 | 26.45800000 | -0.44300000 |

|    |             |             |             |
|----|-------------|-------------|-------------|
| O  | 33.18700000 | 26.74200000 | -1.32900000 |
| N  | 35.14800000 | 27.23300000 | -0.28200000 |
| C  | 36.12500000 | 27.01300000 | 0.65600000  |
| N  | 37.15900000 | 27.86300000 | 0.64700000  |
| N  | 36.09100000 | 26.03000000 | 1.53700000  |
| C  | 34.98500000 | 25.26800000 | 1.40300000  |
| N  | 35.17900000 | 28.96100000 | 3.59200000  |
| C  | 35.07100000 | 29.89400000 | 2.58500000  |
| O  | 35.90700000 | 30.76200000 | 2.38100000  |
| N  | 33.93500000 | 29.78100000 | 1.82400000  |
| C  | 32.92000000 | 28.85500000 | 1.96600000  |
| O  | 31.95300000 | 28.88500000 | 1.20300000  |
| C  | 33.09600000 | 27.91000000 | 3.04500000  |
| C  | 34.20300000 | 28.00700000 | 3.79400000  |
| C  | 36.37600000 | 29.00000000 | 4.44800000  |
| Te | 31.59400000 | 26.42300000 | 3.37100000  |
| H  | 36.41091270 | 24.21661470 | 3.30784070  |
| H  | 32.97398020 | 22.83697830 | 2.15874200  |
| H  | 37.80462140 | 27.76063240 | 1.43095290  |
| H  | 34.42304210 | 27.30776330 | 4.61463040  |
| H  | 36.98617050 | 29.86211880 | 4.12887150  |
| H  | 36.08591650 | 29.12230710 | 5.51028830  |
| H  | 36.95422950 | 28.06105370 | 4.32915830  |
| H  | 34.91806470 | 23.87302560 | 4.26276820  |
| H  | 35.62405170 | 22.59628800 | 3.19827960  |
| H  | 37.01985440 | 28.82864660 | 0.34349710  |
| H  | 35.23827040 | 27.98763820 | -0.96824950 |
| H  | 33.81272040 | 30.47814300 | 1.08382000  |
| H  | 30.77206314 | 27.45084775 | 4.42934585  |

**3FA1 (-H replacing a SeH group)**

|   |             |             |             |
|---|-------------|-------------|-------------|
| C | 35.44200000 | 23.68400000 | 3.30300000  |
| N | 34.65800000 | 24.18600000 | 2.18000000  |
| C | 33.46200000 | 23.70800000 | 1.70000000  |
| N | 33.00100000 | 24.40300000 | 0.69500000  |
| C | 33.95400000 | 25.39500000 | 0.49900000  |
| C | 34.00200000 | 26.45800000 | -0.44300000 |
| O | 33.18700000 | 26.74200000 | -1.32900000 |
| N | 35.14800000 | 27.23300000 | -0.28200000 |
| C | 36.12500000 | 27.01300000 | 0.65600000  |
| N | 37.15900000 | 27.86300000 | 0.64700000  |
| N | 36.09100000 | 26.03000000 | 1.53700000  |
| C | 34.98500000 | 25.26800000 | 1.40300000  |
| N | 35.17900000 | 28.96100000 | 3.59200000  |
| C | 35.07100000 | 29.89400000 | 2.58500000  |
| O | 35.90700000 | 30.76200000 | 2.38100000  |
| N | 33.93500000 | 29.78100000 | 1.82400000  |
| C | 32.92000000 | 28.85500000 | 1.96600000  |
| O | 31.95300000 | 28.88500000 | 1.20300000  |
| C | 33.09600000 | 27.91000000 | 3.04500000  |
| C | 34.20300000 | 28.00700000 | 3.79400000  |
| C | 36.37600000 | 29.00000000 | 4.44800000  |
| H | 36.41091270 | 24.21661470 | 3.30784070  |
| H | 32.97398020 | 22.83697830 | 2.15874200  |
| H | 37.80462140 | 27.76063240 | 1.43095290  |
| H | 34.42304210 | 27.30776330 | 4.61463040  |
| H | 36.98617050 | 29.86211880 | 4.12887150  |
| H | 36.08591650 | 29.12230710 | 5.51028830  |
| H | 36.95422950 | 28.06105370 | 4.32915830  |
| H | 34.91806470 | 23.87302560 | 4.26276820  |
| H | 35.62405170 | 22.59628800 | 3.19827960  |

|   |             |             |             |
|---|-------------|-------------|-------------|
| H | 37.01985440 | 28.82864660 | 0.34349710  |
| H | 35.23827040 | 27.98763820 | -0.96824950 |
| H | 33.81272040 | 30.47814300 | 1.08382000  |
| H | 32.34449515 | 27.16600019 | 3.20810958  |

**3FA1 (closed conformation)**

|    |             |             |            |
|----|-------------|-------------|------------|
| C  | 34.18700000 | 23.71400000 | 5.31300000 |
| O  | 34.26100000 | 23.98600000 | 6.71700000 |
| N  | 35.17900000 | 28.96100000 | 3.59200000 |
| C  | 35.07100000 | 29.89400000 | 2.58500000 |
| O  | 35.90700000 | 30.76200000 | 2.38100000 |
| N  | 33.93500000 | 29.78100000 | 1.82400000 |
| C  | 32.92000000 | 28.85500000 | 1.96600000 |
| O  | 31.95300000 | 28.88500000 | 1.20300000 |
| C  | 33.09600000 | 27.91000000 | 3.04500000 |
| C  | 34.20300000 | 28.00700000 | 3.79400000 |
| C  | 36.37600000 | 29.00000000 | 4.44800000 |
| C  | 36.28700000 | 29.99300000 | 5.60800000 |
| C  | 35.86100000 | 29.11700000 | 6.77000000 |
| O  | 36.31700000 | 29.64300000 | 8.01900000 |
| C  | 36.57000000 | 27.80700000 | 6.46100000 |
| O  | 36.53800000 | 27.70500000 | 5.02100000 |
| C  | 35.93900000 | 26.58100000 | 7.08100000 |
| O  | 34.55500000 | 26.50400000 | 6.73100000 |
| P  | 33.62200000 | 25.34400000 | 7.30600000 |
| O  | 32.27200000 | 25.51200000 | 6.71200000 |
| O  | 33.76800000 | 25.30500000 | 8.78300000 |
| Te | 31.59400000 | 26.42300000 | 3.37100000 |
| H  | 33.1353625  | 23.7743621  | 4.9549109  |
| H  | 34.4036683  | 27.3307351  | 4.6425691  |
| H  | 37.2186559  | 29.2424404  | 3.7669756  |
| H  | 37.2937401  | 30.4028193  | 5.8316201  |
| H  | 35.6131463  | 30.8407794  | 5.3857035  |
| H  | 34.7617394  | 28.9404084  | 6.7664826  |
| H  | 35.8486193  | 29.1418603  | 8.7127899  |
| H  | 37.6252384  | 27.8935898  | 6.8180674  |
| H  | 36.0387488  | 26.6275056  | 8.1926002  |
| H  | 36.4764529  | 25.6638540  | 6.7463450  |
| H  | 34.5877779  | 22.6929008  | 5.1371701  |
| H  | 34.7904966  | 24.4389225  | 4.7144550  |
| H  | 33.8294879  | 30.4678231  | 1.0729630  |
| H  | 31.0510918  | 26.6989437  | 1.7938299  |

**3FA1 (open conformation)**

|   |             |             |             |
|---|-------------|-------------|-------------|
| C | 35.18803278 | 25.94751660 | 10.74839199 |
| O | 35.10662083 | 25.03351712 | 9.64900441  |
| N | 35.17900000 | 28.96100000 | 3.59200000  |
| C | 35.07100000 | 29.89400000 | 2.58500000  |
| O | 35.90700000 | 30.76200000 | 2.38100000  |
| N | 33.93500000 | 29.78100000 | 1.82400000  |
| C | 32.92000000 | 28.85500000 | 1.96600000  |
| O | 31.95300000 | 28.88500000 | 1.20300000  |
| C | 33.09600000 | 27.91000000 | 3.04500000  |
| C | 34.20300000 | 28.00700000 | 3.79400000  |
| C | 36.37600000 | 29.00000000 | 4.44800000  |
| C | 36.28700000 | 29.99300000 | 5.60800000  |
| C | 35.86100000 | 29.11700000 | 6.77000000  |
| O | 36.31700000 | 29.64300000 | 8.01900000  |
| C | 36.57000000 | 27.80700000 | 6.46100000  |
| O | 36.53800000 | 27.70500000 | 5.02100000  |
| C | 35.93900000 | 26.58100000 | 7.08100000  |

|    |             |             |             |
|----|-------------|-------------|-------------|
| O  | 36.81772350 | 26.00743748 | 8.05195626  |
| P  | 36.43558428 | 24.65964623 | 8.81624832  |
| O  | 37.51927546 | 24.36662813 | 9.78749177  |
| O  | 36.06143397 | 23.63306516 | 7.81100762  |
| Te | 31.59400000 | 26.42300000 | 3.37100000  |
| H  | 35.96115416 | 25.61862903 | 11.47772670 |
| H  | 34.40366830 | 27.33073510 | 4.64256910  |
| H  | 37.21865590 | 29.24244040 | 3.76697560  |
| H  | 37.29374010 | 30.40281930 | 5.83162010  |
| H  | 35.61314630 | 30.84077940 | 5.38570350  |
| H  | 34.76173940 | 28.94040840 | 6.76648260  |
| H  | 35.84861930 | 29.14186030 | 8.71278990  |
| H  | 37.62523840 | 27.89358980 | 6.81806740  |
| H  | 35.72106606 | 25.82693953 | 6.28622632  |
| H  | 34.96357725 | 26.84842351 | 7.54901869  |
| H  | 34.19367083 | 25.98326778 | 11.24250616 |
| H  | 35.45474083 | 26.97979214 | 10.41484901 |
| H  | 33.82948790 | 30.46782310 | 1.07296300  |
| H  | 31.05109180 | 26.69894370 | 1.79382990  |
